# Supplementary material for: Polypolish: Short-read polishing of long-read bacterial genome assemblies
Source: PLoS Comput Biol. 2022 Jan 24;18(1):e1009802. doi: 10.1371/journal.pcbi.1009802 (PMC8812927; doi:10.1371/journal.pcbi.1009802)
Supplement: S4 Table — (XLSX) [file pcbi.1009802.s018.xlsx]

## Sheet: Sheet1
Table S4: For each of the 100 simulated-read genomes, we conducted a Kendall-rank correlation test using all available assemblies between the assembly's known identity (as determined by alignment to the reference) and 10 different potential predictors. Per-genome Kendall rank correlation coefficients (tau) for each predictor are shown here as a heatmap, ranging from -1 (red) to 1 (blue). The mean…
		Per-genome tau values
Metric	Description	NC_000117.1	NC_000853.1	NC_000907.1	NC_000912.1	NC_000913.3	NC_000915.1	NC_000918.1	NC_000922.1	NC_000962.3	NC_000963.1	NC_000964.3	NC_001318.1	NC_002163.1	NC_002516.2	NC_002528.1	NC_002662.1	NC_002677.1	NC_002695.2	NC_002696.2	NC_002737.2	NC_002929.2	NC_002932.3	NC_002937.3	NC_002939.5	NC_002942.5	NC_002946.2	NC_002947.4	NC_002967.9	NC_002971.4	NC_003030.1	NC_003047.1	NC_003098.1	NC_003143.1	NC_003197.2	NC_003210.1	NC_003450.3	NC_003454.1	NC_003888.3	NC_003902.1	NC_003997.3	NC_004113.1	NC_004116.1	NC_004307.2	NC_004337.2	NC_004347.2	NC_004350.2	NC_004461.1	NC_004463.1
prodigal_count	The total number of gene predictions made by Prodigal.	-0.761057	-0.776123	-0.661242	-0.528381	-0.611461	-0.734939	-0.654683	-0.584603	-0.864812	-0.683786	-0.587846	-0.745101	-0.634081	-0.805344	-0.695725	-0.684827	-0.231324	-0.819634	-0.673291	-0.527192	-0.785231	-0.674191	-0.658385	-0.777509	-0.823029	-0.61396	-0.753189	-0.583199	-0.823638	-0.626776	-0.445742	-0.554912	-0.810325	-0.595428	-0.482783	-0.545566	-0.833722	-0.713915	-0.726907	-0.44765	-0.521411	-0.814795	-0.697015	-0.742541	-0.760811	-0.693033	-0.634716	-0.887315
total_prodigal_length	The sum of the length of all gene predictions made by Prodigal.	0.61143	0.680485	0.303508	0.493728	0.707373	0.7251	0.468227	0.711538	0.507305	0.789944	0.424243	0.732463	0.50134	0.797701	0.676191	0.454965	0.260369	0.803992	0.707519	0.562963	0.277907	0.636646	0.597278	0.722857	0.787966	0.494689	0.810921	0.582015	0.226601	0.476959	0.640394	0.433022	0.834868	0.668974	0.684333	0.694685	0.839004	0.726067	0.715114	0.594085	0.721945	0.256273	0.40494	0.744757	0.764954	0.684737	0.758386	0.722074
mean_prodigal_length	The mean length of all gene predictions made by Prodigal.	0.717109	0.786996	0.577557	0.577411	0.633641	0.772909	0.635451	0.58993	0.85942	0.6891	0.566642	0.758779	0.629342	0.805524	0.733333	0.644342	0.39401	0.848788	0.722866	0.554871	0.815117	0.657365	0.684797	0.751429	0.839542	0.670713	0.789474	0.570136	0.79803	0.69827	0.507389	0.500002	0.81356	0.615207	0.491476	0.607409	0.853315	0.75024	0.775091	0.457109	0.566812	0.798568	0.696298	0.761006	0.778433	0.703704	0.638154	0.906977
total_mapq	The sum of all MAPQ scores (SAM column 5) from short-read alignments, excluding those with a MAPQ of 255 (not available).	-0.355868	0.420438	-0.460385	0.644261	-0.579181	-0.580965	-0.42981	-0.172568	-0.282864	0.401062	-0.20742	0.0411233	-0.540124	-0.196306	0.662463	-0.317048	-0.656587	-0.646945	-0.208578	-0.496284	-0.214207	-0.250399	-0.313442	-0.0215066	-0.317469	-0.626881	-0.462476	-0.528703	-0.206502	0.0346421	-0.311885	-0.141211	-0.413255	-0.684665	-0.405656	-0.438915	-0.503591	-0.237632	-0.0196511	-0.466286	-0.245685	-0.619274	-0.669994	-0.54172	-0.372612	-0.500745	-0.109051	-0.318375
total_alignment_score	The sum of all alignment scores (SAM tag AS) from short-read alignments.	0.868201	0.93219	0.619355	0.861932	0.725807	0.749669	0.729421	0.875292	0.865513	0.958017	0.729874	0.943159	0.712583	0.741082	0.980952	0.739633	0.781108	0.769959	0.705883	0.706173	0.697324	0.868218	0.861389	0.833814	0.751794	0.754298	0.794743	0.754888	0.808955	0.778325	0.768473	0.775202	0.694055	0.710496	0.717422	0.763926	0.787501	0.735046	0.767984	0.753013	0.680163	0.706619	0.781752	0.789474	0.731255	0.747504	0.842348	0.836461
ale_score	The overall score provided by ALE, a composite of placement, insert, k-mer and depth scores.	0.899162	0.87319	0.773738	0.995825	0.879172	0.860928	0.824709	0.851561	0.907165	0.958017	0.850266	0.842542	0.839736	0.839081	1	0.891707	0.928574	0.795947	0.888378	0.816277	0.890825	0.846995	0.875463	0.873039	0.917147	0.814965	0.872729	0.733835	0.871921	0.787112	0.852217	0.814257	0.897052	0.791715	0.876923	0.928398	0.885918	0.818182	0.844296	0.904442	0.689589	0.901787	0.79803	0.811066	0.867005	0.880342	0.892981	0.880359
ale_place_avg	The average placement score provided by ALE.	0.936029	0.979389	0.654755	0.962352	0.790323	0.744371	0.764609	0.919057	0.905711	0.974824	0.738903	0.950499	0.723179	0.750288	1	0.7765	0.794933	0.794317	0.705883	0.73243	0.770931	0.886823	0.877627	0.838803	0.808575	0.71992	0.814965	0.824061	0.804941	0.778325	0.802956	0.831017	0.734654	0.759494	0.772806	0.779841	0.802855	0.788227	0.790752	0.786146	0.680163	0.699463	0.832512	0.843455	0.778433	0.737892	0.856157	0.855359
ale_insert_avg	The average insert score provided by ALE.	-0.0294174	0.122227	0.227738	0.160339	0.321653	0.70871	0.354518	0.180062	0.758512	0.102568	-0.0266334	0.811107	0.52105	0.392106	0.567334	0.242631	0.326684	0.507373	-0.0404323	0.226746	0.510767	0.0726227	0.292921	-0.179489	0.241409	0.544212	0.219729	0.13572	0.198278	0.12817	0.710289	0.321877	0.653779	0.436175	0.0442498	0.5456	0.203113	0.684477	0.403536	-0.238149	-0.0156338	-0.0909371	0.0228832	0.760169	0.357096	0.0642534	0.44878	0.367783
ale_kmer_avg	The average k-mer score provided by ALE.	0.0512821	-0.0788009	-0.0703478	0.0753145	-0.198242	-0.258324	-0.014932	-0.0097092	-0.22563	-0.0683786	0.179526	-0.0110906	-0.120163	0.00251653	-0.142857	-0.11838	0.144046	-0.0780069	-0.233819	-0.0904662	0.368706	-0.655409	-0.373741	-0.862911	0.079924	-0.436617	0.0770421	-0.112183	-0.293547	-0.206857	-0.0707218	-0.128126	0.0953463	-0.251494	-0.0509028	0.0127593	-0.422565	0.438868	-0.425796	-0.00168777	-0.506225	-0.204263	-0.139114	-0.564182	-0.121491	-0.277874	0.046789	0.100041
ale_depth_score_avg	The average depth score provided by ALE.	0.507046	0.566394	0.641431	0.644357	0.71659	0.686093	0.595318	0.589542	0.739362	0.87398	0.698796	0.688686	0.735724	0.708861	0.6	0.753458	0.822583	0.66261	0.629032	0.646914	0.851336	0.647062	0.745679	0.686696	0.719198	0.717897	0.732793	0.612491	0.561576	0.53855	0.668311	0.638767	0.745648	0.667434	0.714947	0.749073	0.806423	0.671728	0.692046	0.751131	0.522268	0.772118	0.765434	0.649123	0.671718	0.652422	0.787112	0.755358
[truncated: 54 more columns]
