# Supplementary material for: Polypolish: Short-read polishing of long-read bacterial genome assemblies
Source: PLoS Comput Biol. 2022 Jan 24;18(1):e1009802. doi: 10.1371/journal.pcbi.1009802 (PMC8812927; doi:10.1371/journal.pcbi.1009802)
Supplement: S6 Table — (XLSX) [file pcbi.1009802.s020.xlsx]

## Sheet: Sheet1
Table S6: Trycycler assembly and Medaka polishing details for each of the real-read sets. In five cases, plasmids did not appear in the Trycycler assemblies due to low read depth, so they were added manually from the Illumina assembly graph to ensure that reads had a target during polishing (only chromosomes were used to determine polisher accuracy). The Klebsiella oxytoca MSB1_2C b assembly was …
Genome	Group	Total depth	trycycler subsample min depth	Subset depth	Notes	Trycycler to reference errors	Trycycler to reference worst-100-bp identity	Trycycler to reference worst-1000-bp identity	Trycycler+Medaka to reference errors	Trycycler+Medaka to reference worst-100-bp identity	Trycycler+Medaka to reference worst-1000-bp identity
Acinetobacter_baumannii_J9	a	707.6	25	85.3		246	0.97	0.997	75	0.97	0.997
Acinetobacter_baumannii_J9	b	24	15	20.1		414	0.97	0.995	242	0.97	0.997
Acinetobacter_baumannii_J9	c	263.4	25	67.5	Small plasmid didn't show up in the assembly, so I manually added it at the end.	194	0.97	0.997	36	0.97	0.997
Acinetobacter_baumannii_J9	d	199.7	25	62.5		336	0.97	0.996	96	0.97	0.997
Citrobacter_koseri_MINF_9D	a	333.1	25	71.7		573	0.97	0.996	145	0.98	0.998
Citrobacter_koseri_MINF_9D	b	96.4	25	49.3		368	0.97	0.996	124	0.98	0.998
Citrobacter_koseri_MINF_9D	c	203.8	25	62.8		297	0.97	0.996	84	0.98	0.997
Citrobacter_koseri_MINF_9D	d	347.9	25	72.5		490	0.97	0.996	124	0.98	0.998
Enterobacter_kobei_MSB1_1B	a	179.1	25	60.5		886	0.96	0.995	479	0.97	0.996
Enterobacter_kobei_MSB1_1B	b	27.6	15	21.6		1308	0.96	0.994	968	0.96	0.995
Enterobacter_kobei_MSB1_1B	c	119.6	25	53.2	None of the small plasmids showed up in the assembly, so I manually added them at the end.	1197	0.96	0.991	955	0.96	0.991
Enterobacter_kobei_MSB1_1B	d	187.8	25	61.4		1317	0.96	0.993	922	0.96	0.995
Haemophilus_M1C132_1	a	865.5	25	88.9		231	0.97	0.995	54	0.97	0.997
Haemophilus_M1C132_1	b	906.4	25	89.8		137	0.97	0.997	36	0.98	0.998
Haemophilus_M1C132_1	c	613.4	25	82.7	Two small plasmids didn't show up in the assembly, so I manually added them at the end.	104	0.97	0.996	21	0.99	0.999
Haemophilus_M1C132_1	d	814.5	25	87.8		194	0.97	0.995	53	0.98	0.998
Klebsiella_oxytoca_MSB1_2C	a	275.1	25	68.3		674	0.96	0.994	148	0.97	0.997
Klebsiella_oxytoca_MSB1_2C	b	10.4	10	10.2	Due to very low read depth, I only had four contigs to make the chromosome, all from Flye, hence the much higher error count.	8754	0.7	0.823	7788	0.66	0.919
Klebsiella_oxytoca_MSB1_2C	c	78.5	25	45.6	The medium (58 kbp) plasmid didn't show up in the assembly, so I manually added it at the end.	362	0.97	0.995	88	0.98	0.997
Klebsiella_oxytoca_MSB1_2C	d	133	25	55.1		583	0.97	0.994	158	0.97	0.997
Klebsiella_variicola_INF345	a	193.8	25	61.9		704	0.96	0.993	158	0.97	0.997
Klebsiella_variicola_INF345	b	48.7	25	37		492	0.97	0.995	171	0.97	0.997
Klebsiella_variicola_INF345	c	237.2	25	65.6	Two small plasmids didn't cluster well, so I manually added them at the end.	379	0.96	0.996	70	0.97	0.997
Klebsiella_variicola_INF345	d	166.3	25	59.2		546	0.96	0.993	126	0.98	0.998
